# Supplementary material for: Differences in cortical activation patterns during action observation, action execution, and interpersonal synchrony between children with or without autism spectrum disorder (ASD): An fNIRS pilot study
Source: PubMed Central journal article supplement (PMC7595285; doi:10.1371/journal.pone.0240301), 2020-10-29
Supplement: pone.0240301.s004.pdf [file pone.0240301.s004.pdf]

**S2 Table** Significant  $p$ -values and direction of effects for post-hoc comparisons based on channel-specific ANOVA findings. We conducted a repeated-measures ANOVA and post-hoc analyses for channel-specific regional comparisons. The repeated-measures ANOVA of condition (Watch, Do, Together) x hemisphere (left, right) x channel assignment (MFG, IFG, STG, MTG, IPL) revealed main effects of condition ( $F(1.9, 360.4) = 21.8, p < 0.001$ ) and channel ( $F(3.5, 668.8) = 7.2, p < 0.001$ ), 2-way interactions of channel x group ( $F(3.5, 668.8) = 14.8, P < 0.001$ ), condition x hemisphere ( $F(1.9, 361.0) = 8.3, p < 0.001$ ), condition x channel ( $F(6.5, 1265.0) = 5.9, p < 0.001$ ), and hemisphere x channel ( $F(3.4, 666.6) = 4.5, p = 0.002$ ), 3-way interactions of hemisphere x channel x group interaction ( $F(3.4, 666.6) = 6.1, p < 0.001$ ), and condition x hemisphere x channel ( $F(7.0, 1352.2) = 4.1, p < 0.001$ ), as well as a four way interaction of condition x hemisphere x channel x group ( $F(7.0, 1352.2) = 4.1, p < 0.001$ ). Note that the results of channel-specific ANOVA are similar to that of the overall regional ANOVA described in the main body of the paper. The results of post-hoc analyses are also similar and are listed in the table below.

| Comparison                     | Significant $p$ values | Direction of effect   |
|--------------------------------|------------------------|-----------------------|
| <b>Group differences</b>       |                        |                       |
| Watch, Left MFG                | 0.011                  | ASD > TD <sup>a</sup> |
| Watch, Right IFG               | 0.017                  | TD > ASD <sup>a</sup> |
| Watch, Right STG               | 0.003                  | TD > ASD <sup>a</sup> |
| Do, Left STG                   | 0.013                  | TD > ASD <sup>a</sup> |
| Do, Left MTG                   | 0.028                  | TD > ASD <sup>b</sup> |
| Do, Right IFG                  | 0.008                  | TD > ASD <sup>a</sup> |
| Do, Right STG                  | < 0.001                | TD > ASD <sup>a</sup> |
| Do, Right MTG                  | 0.027                  | TD > ASD <sup>b</sup> |
| Do, Right IPL                  | 0.001                  | ASD > TD <sup>a</sup> |
| Together, Left MFG             | 0.017                  | ASD > TD <sup>a</sup> |
| Together, Left STG             | < 0.001                | TD > ASD <sup>a</sup> |
| Together, Right MFG            | 0.015                  | TD > ASD <sup>a</sup> |
| Together, Right IFG            | 0.009                  | TD > ASD <sup>a</sup> |
| Together, Right STG            | 0.034                  | TD > ASD <sup>b</sup> |
| Together, Right IPL            | 0.006                  | ASD > TD <sup>a</sup> |
| <b>Conditional differences</b> |                        |                       |
| TD, Left MFG                   | < 0.001                | D > W <sup>a</sup>    |
|                                | < 0.001                | T > W <sup>a</sup>    |
| TD, Left IFG                   | < 0.001                | D > W <sup>a</sup>    |
|                                | 0.013                  | T > W <sup>a</sup>    |
| TD, Left STG                   | < 0.001                | D > W <sup>a</sup>    |
|                                | 0.004                  | T > W <sup>a</sup>    |
| TD, Left MTG                   | 0.021                  | T > W <sup>b</sup>    |
| TD, Left IPL                   | 0.008                  | D > W <sup>a</sup>    |
|                                | 0.014                  | T > W <sup>a</sup>    |
| TD, Right MFG                  | < 0.001                | T > W <sup>a</sup>    |
|                                | 0.017                  | T > D <sup>a</sup>    |
| TD, Right IFG                  | 0.015                  | D > W <sup>a</sup>    |
| TD, Right MTG                  | 0.017                  | T > D <sup>a</sup>    |
| TD, Right IPL                  | 0.002                  | T > W <sup>a</sup>    |
|                                | 0.003                  | T > D <sup>a</sup>    |
| ASD, Left MFG                  | 0.003                  | D > W <sup>a</sup>    |
|                                | < 0.001                | T > W <sup>a</sup>    |
| ASD, Left STG                  | 0.024                  | D > W <sup>b</sup>    |
|                                | 0.020                  | W > T <sup>b</sup>    |

|                                |         |                    |
|--------------------------------|---------|--------------------|
| ASD, Left, IPL                 | < 0.001 | D > T <sup>a</sup> |
|                                | < 0.001 | D > W <sup>a</sup> |
|                                | < 0.001 | T > W <sup>a</sup> |
| ASD, Right MTG                 | 0.016   | T > W <sup>a</sup> |
|                                | 0.038   | T > D <sup>b</sup> |
| ASD, Right IPL                 | 0.009   | D > W <sup>a</sup> |
|                                | < 0.001 | T > W <sup>a</sup> |
| <b>Hemispheric differences</b> |         |                    |
| TD, Do, MTG                    | 0.025   | L > R <sup>b</sup> |
| TD, Do, MTG                    | 0.006   | L > R <sup>a</sup> |
| TD, Do, IPL                    | 0.045   | L > R <sup>b</sup> |
| ASD, Watch, IPL                | 0.031   | R > L <sup>b</sup> |
| ASD, Do, MFG                   | < 0.001 | L > R <sup>a</sup> |
| ASD, Do, MSTS                  | < 0.001 | L > R <sup>a</sup> |
| ASD, Do, MTG                   | 0.048   | R > L <sup>b</sup> |
| ASD, Together, MFG             | < 0.001 | L > R <sup>a</sup> |
| ASD, Together, STG             | 0.009   | R > L <sup>a</sup> |
| ASD, Together, IPL             | 0.012   | R > L <sup>b</sup> |
